# Supplementary material
Source: PubMed Central journal article supplement (PMC4529371)

# Smith Unedited Gels

## Smith Unedited Gels for Fig. 3a

**B2M**

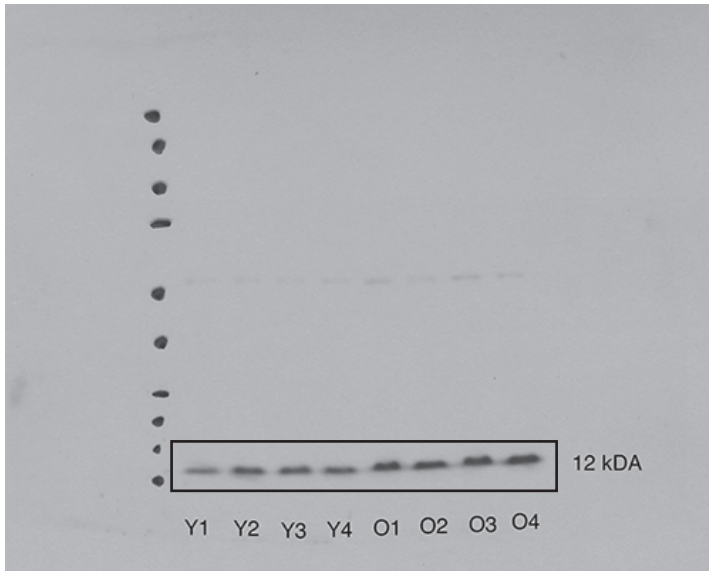

**Actin**

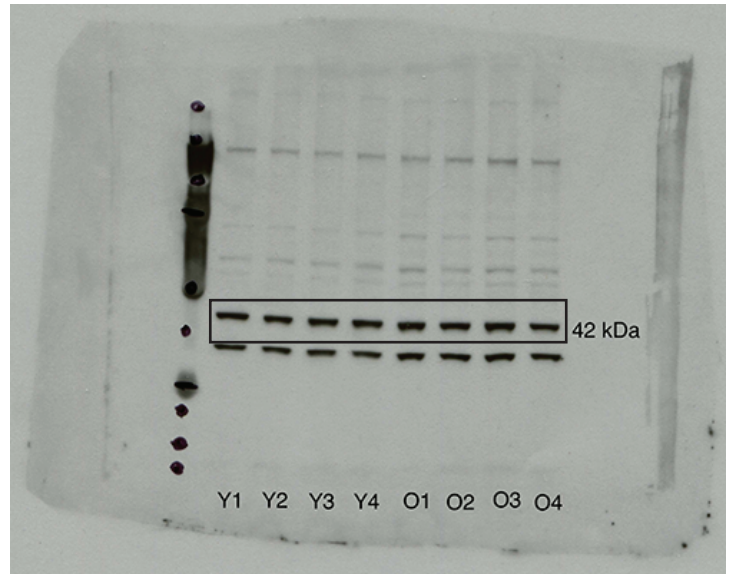

## Smith Unedited Gels for Fig. 3a

**B2M**

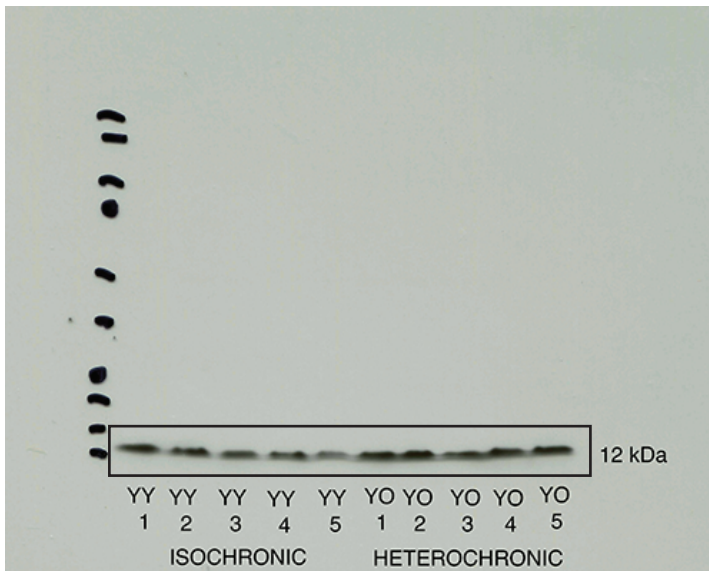

**Actin**

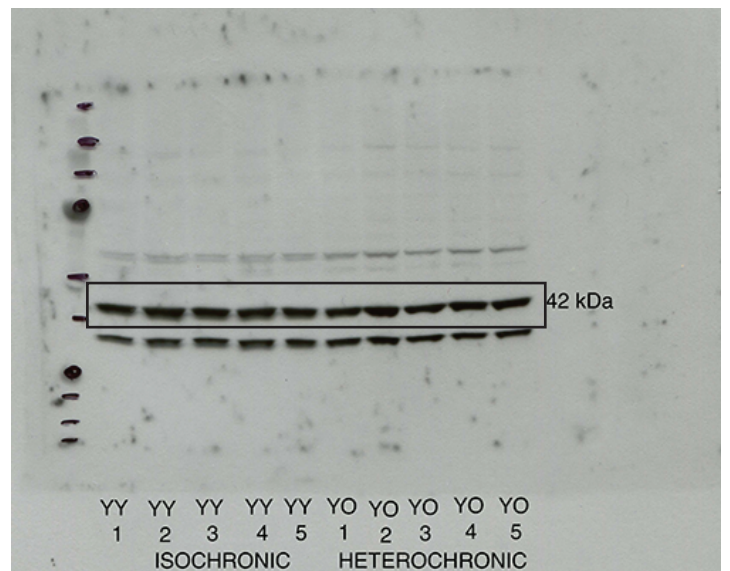

Supplement: NIHMS698774-supplement-2.pdf [file NIHMS698774-supplement-2.pdf]
